# Supplementary material
Source: PubMed Central journal article supplement (PMC8403269)
Supplement: NIHMS1701432-supplement-Supplementary_Material_Appendix_2.pdf [file NIHMS1701432-supplement-Supplementary_Material_Appendix_2.pdf]

**Table S1: Clinical and genetic characteristics of the MSKCC colorectal c**

Legend: All data was extracted from the electronic medical record with verification of 3% of patient data by licensed physicians. MMR/*pol-d* status classification was assigned per Supplementary methods. Calculations were performed with R statistical software. "NE" indicates not evaluable

| <b>Covariate</b>                        | <b>All patients<br/>(N=4283)</b> | <b>TMB&lt;10 mut/Mb<br/>(N=3464)</b> | <b>TMB≥10<br/>mut/Mb<br/>(N=793)</b> |
|-----------------------------------------|----------------------------------|--------------------------------------|--------------------------------------|
| <b>Fraction of total population (%)</b> | <b>100%</b>                      | 81%                                  | 18%                                  |
| <b>Median age (range) -yr</b>           | <b>58 (14-90)</b>                | 57 (14-90)                           | 63 (19-90)                           |
| <b>Sex- no. (%)</b>                     |                                  |                                      |                                      |
| Male:                                   | <b>2333 (54%)</b>                | 1912 (55%)                           | 404 (51%)                            |
| Female                                  | <b>1942 (45%)</b>                | 1546 (45%)                           | 387 (49%)                            |
| Unknown                                 | <b>8 (0%)</b>                    | 6 (0%)                               | 2 (0%)                               |
| <b>Race- no. (%)</b>                    |                                  |                                      |                                      |
| White                                   | <b>3286 (77%)</b>                | 2622 (76%)                           | 642 (81%)                            |
| Black                                   | <b>307 (7%)</b>                  | 260 (8%)                             | 47 (6%)                              |
| Asian                                   | <b>348 (8%)</b>                  | 299 (9%)                             | 46 (6%)                              |
| Other                                   | <b>342 (8%)</b>                  | 283 (8%)                             | 58 (7%)                              |
| <b>Tumor Sidedness-no. (%)</b>          |                                  |                                      |                                      |
| Left-sided                              | <b>2208 (52%)</b>                | 1873 (54%)                           | 318 (40%)                            |
| Right-sided                             | <b>438 (10%)</b>                 | 275 (8%)                             | 163 (21%)                            |
| Unknown                                 | <b>1636 (38%)</b>                | 1315 (38%)                           | 312 (39%)                            |
| <b>Histological Subtype -no. (%)</b>    |                                  |                                      |                                      |
| Adenocarcinoma                          | <b>4168 (97%)</b>                | 3400 (98%)                           | 744 (94%)                            |
| Mucinous adenocarcinoma                 | <b>115 (3%)</b>                  | 64 (2%)                              | 49 (6%)                              |
| <b>Median TMB (range)</b>               | <b>6.1 (0-415)</b>               | 5.6 (0-9.8)                          | 37.7 (10-415)                        |
| <b>MMR/<i>pol-d</i> status</b>          |                                  |                                      |                                      |
| MMRp                                    | <b>3787 (88%)</b>                | 3461 (100%)                          | 326 (41%)                            |
| MMRd                                    | <b>431 (10%)</b>                 | 3 (0%)                               | 428 (54%)                            |
| <i>pol-d</i>                            | <b>39 (1%)</b>                   | 0 (0%)                               | 39 (5%)                              |
| Indeterminate                           | <b>26 (1%)</b>                   | 0 (0%)                               | 0 (0%)                               |

# Cancer patient cohort according to TMB status

## Unknown

(N=26)

1%

54.5 (22-88)

17 (65%)

9 (35%)

0 (0%)

22 (85%)

0 (0%)

3 (12%)

1 (4%)

17 (65%)

0 (0%)

9 (35%)

24 (92%)

2 (8%)

NE

0 (0%)

0 (0%)

0 (0%)

26 (100%)

**Table S2: Clinical and genetic characteristics of advanced colore**

Legend: All data was manually abstracted from the electronic medical record and verified by licensed physicians. Mutational characteristics are reported from MSKCC IMPACT Next Generation Sequencing panel results. MMR/*pol-d* status classification was assigned per Supplementary Methods. Calculations were performed with R statistical software.

| <b>Covariate</b>                                         | <b>All patients (N=137)</b> |
|----------------------------------------------------------|-----------------------------|
| <b>Median Age (range) -yr</b>                            | <b>52.5 (18.8-86)</b>       |
| <b>Sex- no. (%)</b>                                      |                             |
| Male:                                                    | <b>75 (55%)</b>             |
| Female                                                   | <b>62 (45%)</b>             |
| <b>Race- no. (%)</b>                                     |                             |
| White                                                    | <b>104 (76%)</b>            |
| Black                                                    | <b>9 (7%)</b>               |
| Asian                                                    | <b>15 (11%)</b>             |
| Other                                                    | <b>6 (4%)</b>               |
| <b>Tumor Sidedness-no. (%)</b>                           |                             |
| Left-sided                                               | <b>79 (58%)</b>             |
| Right-sided                                              | <b>57 (42%)</b>             |
| Unknown                                                  | <b>1 (1%)</b>               |
| <b>Histological Subtype -no. (%)</b>                     |                             |
| Adenocarcinoma                                           | <b>116 (85%)</b>            |
| Mucinous adenocarcinoma                                  | <b>14 (10%)</b>             |
| Medullary carcinoma                                      | <b>2 (1%)</b>               |
| Signet ring                                              | <b>5 (4%)</b>               |
| <b>Median TMB (range)</b>                                | <b>7.9 (0-369)</b>          |
| TMB $\geq$ 10                                            | <b>52 (38%)</b>             |
| TMB<10                                                   | <b>85 (62%)</b>             |
| <b>Mutation Characteristics-no. (%)</b>                  |                             |
| KRAS driver mutation                                     | <b>71 (52%)</b>             |
| No KRAS driver mutation                                  | <b>66 (48%)</b>             |
| NRAS driver mutation                                     | <b>6 (4%)</b>               |
| No NRAS driver mutation                                  | <b>131 (96%)</b>            |
| BRAF driver mutation                                     | <b>9 (7%)</b>               |
| No BRAF driver mutation                                  | <b>128 (93%)</b>            |
| <b>Treatment Characteristics-no. (%)</b>                 |                             |
| Single immune checkpoint Inhibitor                       | <b>71 (52%)</b>             |
| Combination immune checkpoint inhibitors                 | <b>24 (17%)</b>             |
| Combination immune checkpoint inhibitor and other agent  | <b>42 (31%)</b>             |
| <b>Median number of previous treatment lines (range)</b> | <b>2 (0-5)</b>              |

**rectal cancer patients exposed to immune checkpoint inhibitors**

| <b>MMRp TMB&lt;10<br/>(N= 84)</b> | <b>MMRp TMB≥10<br/>(N= 13)</b> | <b>MMRd<br/>(N=36)</b> | <b><i>pol-d</i> (N=4)</b> |
|-----------------------------------|--------------------------------|------------------------|---------------------------|
| 50.8 (18.8-80.2)                  | 62.7 (43.8-80.4)               | 58.9 (23.6-86)         | 61.5 (52.8-65.4)          |
| 42 (50.0%)                        | 9 (69.2%)                      | 20 (55.6%)             | 4 (100.0%)                |
| 42 (50.0%)                        | 4 (30.8%)                      | 16 (44.4%)             | 0 (0.0%)                  |
| 67 (79.8%)                        | 11 (84.6%)                     | 25 (69.4%)             | 1 (25.0%)                 |
| 5 (6.0%)                          | 1 (7.7%)                       | 2 (5.6%)               | 1 (25.0%)                 |
| 6 (7.1%)                          | 1 (7.7%)                       | 7 (19.4%)              | 1 (25.0%)                 |
| 6 (7.1%)                          | 0 (0.0%)                       | 2 (5.6%)               | 1 (25.0%)                 |
| 60 (71.4%)                        | 4 (30.8%)                      | 15 (41.7%)             | 0 (0.0%)                  |
| 23 (27.4%)                        | 9 (69.2%)                      | 21 (58.3%)             | 4 (100.0%)                |
| 1 (1.2%)                          | 0 (0.0%)                       | 0 (0.0%)               | 0 (0.0%)                  |
| 79 (94.0%)                        | 11 (84.6%)                     | 22 (61.1%)             | 4 (100.0%)                |
| 4 (4.8%)                          | 2 (15.4%)                      | 8 (22.2%)              | 0 (0.0%)                  |
| 0 (0.0%)                          | 0 (0.0%)                       | 2 (5.6%)               | 0 (0.0%)                  |
| 1 (1.2%)                          | 0 (0.0%)                       | 4 (11.1%)              | 0 (0.0%)                  |
| 5.4 (0-9.8)                       | 166 (65-204)                   | 58 (8.8-369)           | 166 (64.9-204)            |
| 0 (0.0%)                          | 13 (100.0%)                    | 35 (97.2%)             | 4 (100.0%)                |
| 84 (100.0%)                       | 0 (0.0%)                       | 1 (2.8%)               | 0 (0.0%)                  |
| 45 (53.6%)                        | 8 (61.5%)                      | 15 (41.7%)             | 3 (75.0%)                 |
| 39 (46.4%)                        | 5 (38.5%)                      | 21 (58.3%)             | 1 (25.0%)                 |
| 6 (7.1%)                          | 0 (0.0%)                       | 0 (0.0%)               | 0 (0.0%)                  |
| 78 (92.9%)                        | 13 (100.0%)                    | 36 (100.0%)            | 4 (100.0%)                |
| 1 (1.2%)                          | 2 (15.4%)                      | 6 (16.7%)              | 0 (0.0%)                  |
| 83 (98.8%)                        | 11 (84.6%)                     | 30 (83.3%)             | 4 (100.0%)                |
| 30 (35.7%)                        | 8 (61.5%)                      | 29 (80.6%)             | 4 (100.0%)                |
| 16 (19.0%)                        | 1 (7.7%)                       | 7 (19.4%)              | 0 (0.0%)                  |
| 38 (45.2%)                        | 4 (30.8%)                      | 0 (0.0%)               | 0 (0.0%)                  |
| 3 (0-5)                           | 3 (0-5)                        | 1 (0-4)                | 3 (2-4)                   |

### Table S3: Univariate and multivariate analyses of overall survival

Legend: Survival rates and median overall survival were calculated for all patients with advanced colorectal cancer using Kaplan-Meier analysis. Hazard ratios (HR) for death were calculated using Cox Proportional Hazards Regression. Covariates with HR showing an association (95% CI not overlapping 1.0) between overall survival or progression free survival (Table S6) were placed into a multivariate Cox proportional hazards regression model together. Patients with combination checkpoint inhibitor and non-checkpoint inhibitor therapy were not included in the univariate checkpoint inhibitor treatment analysis. "NR" indicates

| Covariate                                | Number of patients |
|------------------------------------------|--------------------|
| <b>DNA Repair Status</b>                 |                    |
| MMRp TMB<10                              | 84                 |
| MMRp TMB≥10                              | 13                 |
| MMRd                                     | 36                 |
| <i>pol-d</i>                             | 4                  |
| <b>Age (continuous)</b>                  |                    |
| <b>Sex</b>                               |                    |
| Female                                   | 62                 |
| Male                                     | 75                 |
| <b>Race</b>                              |                    |
| Non-Caucasian                            | 33                 |
| Caucasian                                | 104                |
| <b>Tumor Sidedness</b>                   |                    |
| Left-sided                               | 79                 |
| Right-sided                              | 57                 |
| <b>Mutational Status</b>                 |                    |
| No KRAS driver mutation                  | 66                 |
| KRAS driver mutation                     | 71                 |
| No BRAF driver mutation                  | 128                |
| BRAF driver mutation                     | 9                  |
| <b>Checkpoint Inhibitor Treatment</b>    |                    |
| Single immune checkpoint inhibitor       | 71                 |
| Combination immune checkpoint inhibitors | 24                 |

Survival of advanced colorectal cancer patients exposed to i

| Univariate Analysis          |                     |                      |
|------------------------------|---------------------|----------------------|
| Median OS in months (95% CI) | 1 year OS (95% CI)  | 2 year OS (95% CI)   |
| 12.1 (9.61-15.3)             | 52.2% (40.8%-62.5%) | 21.8% (12.8%-32.3%)  |
| 10.6 (4.41-22.2)             | 41.0% (13.8%-66.9%) | 15.4% (1.1%-46.2%)   |
| NR (34.28-NE)                | 69.4% (51.7%-81.8%) | 69.4% (51.7%-81.8%)  |
| NR (1.68-NE)                 | 75% (12.8%-96.1%)   | 75% (12.8%-96.1%)    |
| 18.2 (12.0-31.2)             | 50.3% (37.1%-62.2%) | 31.8% (20.1%-44.0%)  |
| 12.0 (7.76-14.6)             | 62.1% (50.0%-72.1%) | 41.7% (29.7%-53.2%)  |
| 18.6 (7.76-NE)               | 54.4% (36.1%-69.5%) | 44.3% (26.8%-60.4%)  |
| 14.1 (11.18-18.2)            | 57.7% (47.5%-66.7%) | 34.7% (25.0%-44.6%)  |
| 13.4 (9.90-34.3)             | 57.5% (45.7%-67.6%) | 33.1% (21.9%-44.7%)  |
| 15.3 (9.67-22.2)             | 57.1% (43.1%-68.9%) | 42.3% (29.1%-54.8%)  |
| 14.1 (7.76-20.9)             | 56.1% (43.3%-67.0%) | 31.0% (19.8%-42.8%)  |
| 14.2 (10.76-33.6)            | 57.2% (44.5%-68.1%) | 43.6% (31.2%-55.4%)  |
| 14.2 (10.9-18.6)             | 56.1% (46.9%-64.3%) | 36.8% (27.9% -45.6%) |
| 22.2 (0.72-NE)               | 66.7% (28.2%-87.8%) | 41.7% (10.9%-70.8%)  |
| 16.4 (8.81-31.2)             | 55.7% (43.3%-66.4%) | 43.9% (31.7%-55.5%)  |
| 16.2 (11.9-34.3)             | 70.8% (48.4%-84.9%) | 33.3% (15.9%-51.9%)  |

## immune checkpoint inhibitors

| Multivariate Analysis |                       |
|-----------------------|-----------------------|
| HR for death (95% CI) | HR for death (95% CI) |
| (ref)                 | (ref)                 |
| 1.17 (0.60-2.28)      | 1.17 (0.59-2.32)      |
| 0.29 (0.15-0.53)      | 0.29 (0.15-0.54)      |
| 0.18 (0.02-1.35)      | 0.18 (0.02-1.37)      |
| 1.00 (0.99-1.02)      |                       |
| (ref)                 |                       |
| 0.74 (0.49-1.13)      |                       |
| (ref)                 |                       |
| 1.31 (0.78-2.17)      |                       |
| (ref)                 | (ref)                 |
| 0.87 (0.53-1.22)      | 1.13 (0.72-1.78)      |
| (ref)                 |                       |
| 0.80 (0.53-1.22)      |                       |
| (ref)                 | (ref)                 |
| 0.89 (0.39-2.04)      | 0.77 (0.34-1.72)      |
| (ref)                 |                       |
| 1.07 (0.61-1.87)      |                       |

**Table S4: Hazard ratio for death in cancer patients with tumors treated with immunotherapy**

Legend: Univariate Cox proportional hazards regression was performed to establish HRs for an association between DNA-repair subgroup status and death in each respective tumor type. HRs are represented visually in Figure 1C. An aggregated model was made for patients with breast, kidney, neuroendocrine, uveal melanoma and mucosal melanoma cancers. Patients were aggregated into two models depending on the presence (TMB sensitive) or absence (TMB insensitive) of a positive association of TMB  $\geq 10$  mut/Mb with survival in the respective tumor types. "NE" indicates not evaluable

| <b>TMB Sensitive Primary Tumor Type</b> | <b>Number of patients</b> |
|-----------------------------------------|---------------------------|
| <b>Head and Neck</b>                    |                           |
| MMRp TMB<10                             | 118                       |
| MMRp TMB $\geq 10$                      | 26                        |
| MMRd or <i>pol-d</i>                    | 2                         |
| <b>Melanoma</b>                         |                           |
| MMRp TMB<10                             | 108                       |
| MMRp TMB $\geq 10$                      | 148                       |
| MMRd or <i>pol-d</i>                    | 2                         |
| <b>NSCLC</b>                            |                           |
| MMRp TMB<10                             | 236                       |
| MMRp TMB $\geq 10$                      | 111                       |
| MMRd or <i>pol-d</i>                    | 7                         |
| <b>Combined TMB sensitive tumors</b>    |                           |
| MMRp TMB<10                             | 462                       |
| MMRp TMB $\geq 10$                      | 285                       |
| MMRd or <i>pol-d</i>                    | 11                        |

| <b>TMB Insensitive Primary Tumor Type</b> | <b>Number of patients</b> |
|-------------------------------------------|---------------------------|
| <b>Urinary tract carcinoma</b>            |                           |
| MMRp TMB<10                               | 126                       |
| MMRp TMB $\geq 10$                        | 77                        |
| MMRd or <i>pol-d</i>                      | 10                        |
| <b>CUP</b>                                |                           |
| MMRp TMB<10                               | 44                        |
| MMRp TMB $\geq 10$                        | 19                        |



|                                                                                   |     |
|-----------------------------------------------------------------------------------|-----|
| MMRd or <i>pol-d</i>                                                              | 3   |
| <b>CRC</b>                                                                        |     |
| MMRp TMB<10                                                                       | 65  |
| MMRp TMB≥10                                                                       | 13  |
| MMRd or <i>pol-d</i>                                                              | 35  |
| <b>EG</b>                                                                         |     |
| MMRp TMB<10                                                                       | 107 |
| MMRp TMB≥10                                                                       | 9   |
| MMRd or <i>pol-d</i>                                                              | 10  |
| <b>Brain</b>                                                                      |     |
| MMRp TMB<10                                                                       | 108 |
| MMRp TMB≥10                                                                       | 9   |
| MMRd or <i>pol-d</i>                                                              | 0   |
| <b>Kidney*</b>                                                                    |     |
| MMRp TMB<10                                                                       | 149 |
| MMRp TMB≥10                                                                       | 2   |
| MMRd or <i>pol-d</i>                                                              | 0   |
| <b>Breast*</b>                                                                    |     |
| MMRp TMB<10                                                                       | 43  |
| MMRp TMB≥10                                                                       | 3   |
| MMRd or <i>pol-d</i>                                                              | 0   |
| <b>Mucosal Melanoma*</b>                                                          |     |
| MMRp TMB<10                                                                       | 34  |
| MMRp TMB≥10                                                                       | 2   |
| MMRd or <i>pol-d</i>                                                              | 0   |
| <b>Uveal Melanoma*</b>                                                            |     |
| MMRp TMB<10                                                                       | 20  |
| MMRp TMB≥10                                                                       | 0   |
| MMRd or <i>pol-d</i>                                                              | 0   |
| <b>Neuroendocrine*</b>                                                            |     |
| MMRp TMB<10                                                                       | 13  |
| MMRp TMB≥10                                                                       | 4   |
| MMRd or <i>pol-d</i>                                                              | 0   |
| <b>Combined Kidney, Breast, Mucosal Melanoma, Uveal Melanoma, Neuroendocrine*</b> |     |
| MMRp TMB<10                                                                       | 259 |
| MMRp TMB≥10                                                                       | 11  |
| MMRd or <i>pol-d</i>                                                              | 0   |
| <b>Combined TMB insensitive tumors</b>                                            |     |
| MMRp TMB<10                                                                       | 709 |
| MMRp TMB≥10                                                                       | 138 |
| MMRd or <i>pol-d</i>                                                              | 56  |

ated with immune checkpoint inhibitors classified according to tumor type a

**Hazard Ratio for death  
(95% Confidence Interval)**

(ref)  
0.46 (0.22-0.95)  
0.82 (0.11-6.00)

(ref)  
0.62 (0.41-0.94)  
NE

(ref)  
0.70 (0.52-0.95)  
0.69 (0.25-1.85)

(ref)  
0.52 (0.41-0.64)  
0.81 (0.34-1.97)

**Hazard Ratio for death  
(95% Confidence Interval)**

(ref)  
0.77 (0.50-1.18)  
0.13 (0.02-0.91)

(ref)  
0.72 (0.28-1.81)

0.90 (0.12-6.76)

(ref)

0.87 (0.34-2.25)

0.26 (0.11-0.62)

(ref)

0.97 (0.07-1.29)

0.31 (0.38-2.47)

(ref)

0.74 (0.30-1.85)

NE

(ref)

NE

NE

(ref)

0.27 (0.04-2.05)

NE

(ref)

NE

NE

(ref)

NE

NE

(ref)

0.38 (0.05-3.11)

NE

(ref)

0.40 (0.10-1.62)

NE

(ref)

0.84 (0.63-1.11)

0.34 (0.18-0.61)

**nd stratified by TMB and DNA-repair defect status**

## Table S5: TMB and DNA-repair status of patients with multiple cancer

Legend: Data was obtained from a publicly-available validation cohort of patients with metastatic cancer of different primary tumors treated with immune checkpoint inhibitors from 2015 to 2019. Similar tumor types were consolidated into larger categories according to tumor primary site and pathological results. Mutational and DNA-repair status information was identified using an internal MSKCC institutional database. \*Indicates tumor type combined into "Other Tumors combined" category

### Primary Tumor Type

|                                             | Number of patients |
|---------------------------------------------|--------------------|
| Brain -no. (% tumor type)                   | 117 (7%)           |
| Breast*-no. (% tumor type)                  | 46 (3%)            |
| CRC -no. (% tumor type)                     | 111 (7%)           |
| CUP -no. (% tumor type)                     | 66 (4%)            |
| EG -no. (% tumor type)                      | 126 (7%)           |
| Head and Neck -no. (% tumor type)           | 146 (9%)           |
| Kidney* -no. (% tumor type)                 | 151 (9%)           |
| Melanoma -no. (% tumor type)                | 258 (15%)          |
| Mucosal Melanoma* -no. (% tumor type)       | 36 (2%)            |
| NSCLC -no. (% tumor type)                   | 354 (22%)          |
| Urinary Tract Carcinoma -no. (% tumor type) | 213 (13%)          |
| Uveal Melanoma* -no. (% tumor type)         | 20 (1%)            |
| Neuroendocrine* -no. (% tumor type)         | 17 (1%)            |
| Other Tumors* combined - no. (% tumor type) | 270 (16%)          |
| Total Number -no. (% total number patients) | 1661 (100%)        |

## r types exposed to immune checkpoints inhibitors

| Mutational and DNA-repair status |               |          |            |
|----------------------------------|---------------|----------|------------|
| MMRp TMB<10                      | MMRp TMB ≥ 10 | MMRd     | <i>pol</i> |
| 108 (92%)                        | 9 (8%)        | 0 (0%)   | 0 (0%)     |
| 43 (93%)                         | 3 (7%)        | 0 (0%)   | 0 (0%)     |
| 65 (59%)                         | 13 (12%)      | 29 (26%) | 4 (4%)     |
| 44 (67%)                         | 19 (29%)      | 3 (5%)   | 0 (0%)     |
| 107 (85%)                        | 9 (7%)        | 10 (8%)  | 0 (0%)     |
| 118 (81%)                        | 26 (18%)      | 2 (1%)   | 0 (0%)     |
| 149 (99%)                        | 2 (1%)        | 0 (0%)   | 0 (0%)     |
| 108 (42%)                        | 148 (57%)     | 0 (0%)   | 2 (1%)     |
| 34 (94%)                         | 2 (6%)        | 0 (0%)   | 0 (0%)     |
| 236 (67%)                        | 111 (31%)     | 3 (1%)   | 4 (1%)     |
| 126 (59%)                        | 77 (36%)      | 7 (3%)   | 3 (1%)     |
| 20 (100%)                        | 0 (0%)        | 0 (0%)   | 0 (0%)     |
| 13 (76%)                         | 4 (24%)       | 0 (0%)   | 0 (0%)     |
| 259 (96%)                        | 11 (4%)       | 0 (0%)   | 0 (0%)     |
| 1171 (70%)                       | 423 (25%)     | 54 (3%)  | 13 (1%)    |

**Total DNA Repair-defect**

0 (0%)  
0 (0%)  
33 (30%)  
3 (5%)  
10 (8%)  
2 (1%)  
0 (0%)  
2 (1%)  
0 (0%)  
7 (2%)  
10 (5%)  
0 (0%)  
0 (0%)  
0 (0%)  
67 (4%)

**Immune Checkpoint Inhibitor Therapy**

| <b>PD-1/PDL-1</b> | <b>CTLA4</b> | <b>Combo</b> |
|-------------------|--------------|--------------|
| 114 (97%)         | 0 (0%)       | 3 (3%)       |
| 22 (48%)          | 20 (43%)     | 4 (9%)       |
| 100 (90%)         | 1 (1%)       | 10 (9%)      |
| 60 (91%)          | 0 (0%)       | 6 (9%)       |
| 93 (74%)          | 2 (2%)       | 31 (25%)     |
| 134 (92%)         | 0 (0%)       | 12 (8%)      |
| 122 (81%)         | 0 (0%)       | 29 (19%)     |
| 106 (41%)         | 59 (23%)     | 93 (36%)     |
| 13 (36%)          | 12 (33%)     | 11 (31%)     |
| 333 (94%)         | 0 (0%)       | 21 (6%)      |
| 190 (89%)         | 0 (0%)       | 23 (11%)     |
| 9 (45%)           | 4 (20%)      | 7 (35%)      |
| 11 (65%)          | 1 (6%)       | 5 (29%)      |
| 177 (66%)         | 37 (14%)     | 56 (21%)     |
| 1296 (79%)        | 98 (6%)      | 250 (15%)    |

**Table S6: Univariate and multivariate analyses of progres**

Legend: Survival rates and median progression-free survival were calculated for all patients with advanced colorectal cancer using Kaplan-Meier analysis. Hazard ratios (HR) for death were calculated using Cox Proportional Hazards Regression. Covariates with a positive association between MMRp TMB $\geq$ 10 status and either progression free survival or overall survival (HR 95% CI not overlapping 1.0) were placed into a multivariate model together. Patients with combination checkpoint inhibitor and non-checkpoint inhibitor therapy were not included in the univariate checkpoint inhibitor treatment analysis. "NE" indicates non evaluable

| Covariate                                | Number of patients |
|------------------------------------------|--------------------|
| <b>DNA Repair Status</b>                 |                    |
| MMRp TMB<10                              | 84                 |
| MMRp TMB $\geq$ 10                       | 13                 |
| MMRd                                     | 36                 |
| <i>pol-d</i>                             | 4                  |
| <b>Age (continuous)</b>                  |                    |
| <b>Sex</b>                               |                    |
| Female                                   | 62                 |
| Male                                     | 75                 |
| <b>Race</b>                              |                    |
| Non-Caucasian                            | 33                 |
| Caucasian                                | 104                |
| <b>Primary Tumor Laterality</b>          |                    |
| Left-sided                               | 79                 |
| Right-sided                              | 57                 |
| <b>Mutational Status</b>                 |                    |
| No KRAS driver mutation                  | 66                 |
| KRAS driver mutation                     | 71                 |
| No BRAF driver mutation                  | 128                |
| BRAF driver mutation                     | 9                  |
| <b>Checkpoint Inhibitor Treatment</b>    |                    |
| Single immune checkpoint inhibitor       | 71                 |
| Combination immune checkpoint inhibitors | 24                 |



**ission-free-survival of advanced colorectal cancer patients exposec**

| <b>Univariate Analysis</b>               |                            |                            |
|------------------------------------------|----------------------------|----------------------------|
| <b>Median PFS in months<br/>(95% CI)</b> | <b>1 year PFS (95% CI)</b> | <b>2 year PFS (95% CI)</b> |
| 1.81 (1.64-2.01)                         | 1.2% (0.0%-5.8%)           | 0%                         |
| 2.37 (1.84-4.18)                         | 7.7% (0.4%-29.2%)          | 0%                         |
| 27.01 (9.70-NE)                          | 62.6% (44.3%-76.3%)        | 56.6% (38.6%-71.2%)        |
| 3.68 (1.68-NE)                           | 50% (5.8%-84.5%)           | 50% (5.8%-84.5%)           |
| 2.04 (1.68-3.49)                         | 15.6% (7.8%-25.8%)         | 15.6% (7.8%-25.8%)         |
| 2.73 (1.84-4.18)                         | 21.9% (13.3%-32.0%)        | 16.5% (9.0%-25.8%)         |
| 3.68 (1.84-5.30)                         | 23.3% (10.6%-38.9%)        | 20.0% (8.3%-35.3%)         |
| 2.01 (1.81-3.26)                         | 17.7% (11.0%-25.6%)        | 14.7% (8.7%-22.3%)         |
| 1.92 (1.78-3.26)                         | 12.8% (6.6%-21.2%)         | 11.5% (5.7%-19.7%)         |
| 3.65 (1.97-5.30)                         | 28.3% (17.2%-40.5%)        | 22.7% (12.7%-34.4%)        |
| 2.73 (1.84-4.14)                         | 21.5% (12.3%-32.3%)        | 19.8% (11.1%-30.5%)        |
| 2.01 (1.74-3.65)                         | 16.9% (9.3%-26.4%)         | 12.7% (6.2%-21.5%)         |
| 2.04 (1.84-3.26)                         | 17.3% (11.2%-24.4%)        | 14.0% (8.6%-20.7%)         |
| 8.49 (0.07-NE)                           | 44.4% (13.6%-71.9%)        | 44.4% (13.6%-71.9%)        |
| 3.26 (2.04-4.44)                         | 28.3% (18.3%-39.1%)        | 25.3% (15.8%-36.0%)        |
| 1.81 (1.61-5.69)                         | 21.8% (8.0%-40.0%)         | 17.5% (5.0%-35.1%)         |

## l to immune checkpoint inhibitors

| Multivariate Analysis                   |                                         |
|-----------------------------------------|-----------------------------------------|
| HR for progression or death<br>(95% CI) | HR for progression or death<br>(95% CI) |
| (ref)                                   | (ref)                                   |
| 0.66 (0.37-1.20)                        | 0.72 (0.40-1.30)                        |
| 0.13 (0.07-0.23)                        | 0.13 (0.07-0.24)                        |
| 0.13 (0.03-0.56)                        | 0.16 (0.04-0.71)                        |
| 0.99 (0.98-1.01)                        |                                         |
| (ref)                                   |                                         |
| 0.85 (0.59-1.23)                        |                                         |
| (ref)                                   |                                         |
| 1.34 (0.86-2.07)                        |                                         |
| (ref)                                   | (ref)                                   |
| 0.64 (0.44-0.94)                        | 0.92 (0.61-1.36)                        |
| (ref)                                   |                                         |
| 1.28 (0.88-1.84)                        |                                         |
| (ref)                                   | (ref)                                   |
| 0.39 (0.16-0.95)                        | 0.41 (0.18-0.90)                        |
| (ref)                                   |                                         |
| 1.29 (0.77-2.15)                        |                                         |

**Table S7: Survival from time of advanced cancer diagnosis in patients**

Legend: Median survival from date of metastatic diagnosis to either documented date of patient death or last follow-up (censored at that moment) was performed using Kaplan-Meier analysis for patients with advanced colorectal cancer who were or were not treated with immune checkpoint inhibitors (ICI). The median time from metastatic diagnosis to date of first ICI treatment was also similarly calculated for patients with advanced CRC who were treated with ICI. "NR" indicates not reached and "NE" indicates not evaluable

| TMB subgroup                    | Number of patients |
|---------------------------------|--------------------|
| <b>Non-ICI treated patients</b> |                    |
| TMB<10                          | 1086               |
| TMB≥10                          | 143                |
| <b>ICI-Treated Patients</b>     |                    |
| TMB<10                          | 85                 |
| TMB≥10                          | 42                 |

| DNA-Repair Status Subgroup      | Number of patients |
|---------------------------------|--------------------|
| <b>Non-ICI treated patients</b> |                    |
| MMRp TMB<10                     | 1085               |
| MMRp TMB≥10                     | 117                |
| MMRd                            | 25                 |
| <i>pol-d</i>                    | 2                  |
| <b>ICI-Treated Patients</b>     |                    |
| MMRp TMB<10                     | 84                 |
| MMRp TMB≥10                     | 11                 |
| MMRd                            | 29                 |
| <i>pol-d</i>                    | 3                  |



**nts with colorectal cancer treated with and without ICI**

| <b>Patients without precise stage IV diagnosis date</b> | <b>Median survival (from stage IV diagnosis) in months (95% CI)</b> |
|---------------------------------------------------------|---------------------------------------------------------------------|
| 0                                                       | 38.9 (33.8-49.3)                                                    |
| 0                                                       | 24.0 (14.4-35)                                                      |
| 0                                                       | 51 (45-59)                                                          |
| 10                                                      | 52 (27-NR)                                                          |

| <b>Patients without precise stage IV diagnosis date</b> | <b>Median survival (from stage IV diagnosis) in months (95% CI)</b> |
|---------------------------------------------------------|---------------------------------------------------------------------|
| 0                                                       | 38.9 (33.3-49.3)                                                    |
| 0                                                       | 17.6 (13-27.5)                                                      |
| 0                                                       | NR (28.8-NE)                                                        |
| 0                                                       | 14.4 (14.4-NE)                                                      |
| 0                                                       | 51 (45-60)                                                          |
| 2                                                       | 51 (15-87)                                                          |
| 7                                                       | NR (23-NE)                                                          |
| 1                                                       | NR (6-NE)                                                           |



**Median time from metastatic diagnosis to ICI in months (95% CI)**

N/A  
N/A

29 (23-36)  
13 (7-20)

**Median time from metastatic diagnosis to ICI in months (95% CI)**

N/A  
N/A  
N/A  
N/A

29 (24-36)  
30 (11-45)  
25 (5-14)  
59 (4-NE)

|



## Table S8: Median follow-up time per treatment arm in each study

Legend: Median time from immune checkpoint inhibitor treatment to follow-up was performed using Kaplan-Meier analysis for both the advanced annotated colorectal cohort and larger validation cohort of patients with multiple malignancy types.

### Advanced Colorectal Cohort

#### TMB Subgroups

TMB<10

TMB≥10

#### DNA-repair status Subgroup

MMRp TMB<10

MMRp TMB≥10

MMRd

*pol-d*

### Expanded Cancer Type Cohort

#### TMB Sensitive Primary Tumor Type

##### Head and Neck

MMRp TMB<10

MMRp TMB≥10

MMRd or *pol-d*

##### Melanoma

MMRp TMB<10

MMRp TMB≥10

MMRd or *pol-d*

##### NSCLC

MMRp TMB<10

MMRp TMB≥10

MMRd or *pol-d*

##### Combined TMB sensitive tumors

MMRp TMB<10

MMRp TMB≥10

MMRd or *pol-d*

#### TMB Insensitive Primary Tumor Type

##### Urinary tract carcinoma

MMRp TMB<10

MMRp TMB≥10

MMRd or *pol-d*

##### CUP

MMRp TMB<10

MMRp TMB $\geq$ 10  
MMRd or *pol*-d

### **CRC**

MMRp TMB<10  
MMRp TMB $\geq$ 10  
MMRd or *pol*-d

### **EG**

MMRp TMB<10  
MMRp TMB $\geq$ 10  
MMRd or *pol*-d

### **Brain**

MMRp TMB<10  
MMRp TMB $\geq$ 10  
MMRd or *pol*-d

### **Kidney\***

MMRp TMB<10  
MMRp TMB $\geq$ 10  
MMRd or *pol*-d

### **Breast\***

MMRp TMB<10  
MMRp TMB $\geq$ 10  
MMRd or *pol*-d

### **Mucosal Melanoma\***

MMRp TMB<10  
MMRp TMB $\geq$ 10  
MMRd or *pol*-d

### **Uveal Melanoma\***

MMRp TMB<10  
MMRp TMB $\geq$ 10  
MMRd or *pol*-d

### **Neuroendocrine\***

MMRp TMB<10  
MMRp TMB $\geq$ 10  
MMRd or *pol*-d

### **Combined Kidney, Breast, Mucosal Melanoma, Uveal Melanoma, Neuroendocrine\***

MMRp TMB<10  
MMRp TMB $\geq$ 10  
MMRd or *pol*-d

### **Combined TMB insensitive tumors**

MMRp TMB<10  
MMRp TMB $\geq$ 10  
MMRd or *pol*-d

cohort

| Number of patients | Median Follow-up in months (95% CI) |
|--------------------|-------------------------------------|
| 85                 | 26.3 (21.5-38.9)                    |
| 52                 | 33.5 (28.8-38.1)                    |
| 84                 | 26.3 (22.5-NR)                      |
| 13                 | 17.7 (17.7-NR)                      |
| 36                 | 33.3 (29.7-49.5)                    |
| 4                  | 33.8 (33.5-NR)                      |

| Number of patients | Median Follow-Up in months (95% CI) |
|--------------------|-------------------------------------|
| 118                | 14 (12-24)                          |
| 26                 | 15 (8-21)                           |
| 2                  | 16 (NE)                             |
| 108                | 29 (24-32)                          |
| 148                | 25 (23-30)                          |
| 2                  | 5.5 (1-NR)                          |
| 236                | 25 (23-29)                          |
| 111                | 19 (17-22)                          |
| 7                  | 22 (15-NR)                          |
| 462                | 24 (22-27)                          |
| 285                | 21 (20-24)                          |
| 11                 | 16 (15-NR)                          |

| Number patients | Median Follow-Up in months (95% CI) |
|-----------------|-------------------------------------|
| 126             | 14 (10-20)                          |
| 77              | 17 (15-27)                          |
| 10              | 25 (6-NR)                           |
| 44              | 9 (5-16)                            |

|    |          |
|----|----------|
| 19 | 8 (4-NR) |
| 3  | 4 (2-NR) |

|    |            |
|----|------------|
| 65 | 16 (10-27) |
| 13 | 10 (5-NR)  |
| 35 | 26 (10-28) |

|     |           |
|-----|-----------|
| 107 | 9 (8-12)  |
| 9   | 12 (6-NR) |
| 10  | 8 (2-NR)  |

|     |            |
|-----|------------|
| 108 | 23 (21-NR) |
| 9   | 23 (8-NR)  |
| 0   | NE         |

|     |              |
|-----|--------------|
| 149 | 29 (25-33)   |
| 2   | 34.5 (26-NR) |
| 0   | NE           |

|    |              |
|----|--------------|
| 43 | 18 (14-NR)   |
| 3  | 23.5 (19-NR) |
| 0  | NE           |

|    |            |
|----|------------|
| 34 | 29 (20-55) |
| 2  | 24 (17-NR) |
| 0  | NE         |

|    |            |
|----|------------|
| 20 | 23 (19-NR) |
| 0  | NE         |
| 0  | NE         |

|    |           |
|----|-----------|
| 13 | 16 (2-NR) |
| 4  | 3 (2-NR)  |
| 0  | NE        |

|     |            |
|-----|------------|
| 259 | 19 (15-NR) |
| 11  | 26 (24-30) |
| 0   | NE         |

|     |            |
|-----|------------|
| 709 | 21 (19-23) |
| 138 | 15 (12-20) |
| 56  | 12 (9-23)  |

## **Table S9: Restricted Mean Survival Time analysis of patients with**

Legend: Mean survival time and between-group ratios were determined for patients with advanced colorectal cancer treated with immune checkpoint inhibitors (ICI) using a restricted mean survival time analysis at various time intervals between TMB subgroups (using data represented in Figure 1A) and DNA-Repair Status Subgroups (using data represented in Figure 1B). Between group ratios were determined in relation to the labeled "ref" group.

### **TMB Subgroups**

TMB<10

TMB≥10

### **DNA-Repair Status Subgroup**

MMRp TMB<10

MMRp TMB≥10

MMRd

*pol-d*

1 advanced colorectal cancer treated with ICI

**6 month truncated timepoint**

| <b>Restricted Mean Survival Time in months (95% CI)</b> | <b>Between-group ratio (95% CI)</b> |
|---------------------------------------------------------|-------------------------------------|
| 5.40 (5.15-5.65)                                        | (ref)                               |
| 5.21 (4.74-5.67)                                        | 0.97 (0.87-1.07)                    |
| 5.39 (5.14-5.64)                                        | (ref)                               |
| 5.40 (4.76-6.04)                                        | 1.00 (0.88-1.14)                    |
| 5.19 (4.80-5.79)                                        | 0.96 (0.85-1.10)                    |
| 4.92 (3.09-6.75)                                        | 0.91 (0.63-1.33)                    |

**12 month truncated timepoint**

| <b>Restricted Mean Survival Time in months (95% CI)</b> | <b>Between-group ratio (95% CI)</b> |
|---------------------------------------------------------|-------------------------------------|
| 9.13 (8.35-9.90)                                        | (ref)                               |
| 9.41 (8.31-10.51)                                       | 1.031 (0.89-1.19)                   |
| 9.15 (8.37-9.94)                                        | (ref)                               |
| 8.86 (6.95-10.77)                                       | 0.97 (0.77-1.22)                    |
| 9.52 (8.18-10.86)                                       | 1.04 (0.88-1.23)                    |
| 9.42 (5.04-13.80)                                       | 1.03 (0.64-1.65)                    |

### 18 month truncated timepoint

| Restricted Mean Survival Time in months (95% CI) | Between-group ratio (95% CI) |
|--------------------------------------------------|------------------------------|
| 11.54 (10.27-12.81)                              | (ref)                        |
| 13.23 (11.42-15.05)                              | 1.15 (0.96-1.37)             |
| 11.6 (10.32-12.87)                               | (ref)                        |
| 10.92 (7.71-14.14)                               | 0.94 (0.69-1.29)             |
| 13.69 (11.48-15.88)                              | 1.18 (0.97-1.43)             |
| 13.92 (6.99-20.85)                               | 1.20 (0.72-2.00)             |

### 24 month truncated timepoint

| Restricted Mean Survival Time in months (95% CI) | Between-group ratio (95% CI) |
|--------------------------------------------------|------------------------------|
| 13.16 (11.45-14.88)                              | (ref)                        |
| 16.97 (14.41-19.53)                              | 1.29 (1.06-1.57)             |
| 13.24 (11.51-14.97)                              | (ref)                        |
| 12.49 (8.01-16.97)                               | 0.94 (0.63-1.38)             |
| 17.85 (14.78-20.93)                              | 1.35 (1.09-1.67)             |
| 18.42 (8.95-27.89)                               | 1.39 (0.82-2.37)             |

### 30 month truncated timepoint

| <b>Restricted Mean<br/>Survival Time in<br/>months (95% CI)</b> | <b>Between-group ratio (95%<br/>CI)</b> |
|-----------------------------------------------------------------|-----------------------------------------|
| 14.32 (12.20-16.43)                                             | (ref)                                   |
| 20.61 (17.28-23.93)                                             | 1.44 (1.16-1.79)                        |
| 14.41 (12.28-16.54)                                             | (ref)                                   |
| 13.41 (7.92-18.91)                                              | 0.93 (0.60-1.44)                        |
| 22.0 (18.05-25.99)                                              | 7.61 (3.11-12.11)                       |
| 22.92 (10.90-34.94)                                             | 1.59 (0.92-2.74)                        |
